# Supplementary material
Source: Elsevier journal article supplement (https://www.sciencedirect.com/science/article/pii/S0300289620300375)
Supplement: mmc2 [file S0300289620300375:mmc2.pdf]

**Supplementary Table 1. Main patient characteristics, univariate p-values (log-rank test) for disease-free survival (DFS) and overall survival (OS) and the mean  $\pm$  standard deviation (SD) of NNCI expression for each clinical characteristic compared by T-test or ANOVA test according TNM 8<sup>th</sup> edition.**

| Characteristics             | Value                                                                                                      | N=86 (%)                                                                                    | DFS p-value             | OS p-value              | NNCI p-value                   |
|-----------------------------|------------------------------------------------------------------------------------------------------------|---------------------------------------------------------------------------------------------|-------------------------|-------------------------|--------------------------------|
| <b>Sex</b>                  | Male<br>Female                                                                                             | 73 (74.5)<br>25 (25.5)                                                                      | <b>0.005</b>            | <b>0.022</b>            | 0.102                          |
| <b>Age, yrs</b>             | Mean (Range)<br>≤65<br>>65                                                                                 | 67 (38-84)<br>42 (42.1)<br>56 (57.1)                                                        | 0.697                   | 0.361                   | 0.118                          |
| <b>ECOG PS<sup>a</sup></b>  | 0<br>1                                                                                                     | 15 (17.4)<br>71 (82.6)                                                                      | 0.181                   | 0.079                   | 0.341                          |
| <b>Stage</b>                | IA1<br>IA2<br>IA3<br>IB                                                                                    | 4 (4.7)<br>27 (31.4)<br>34 (39.5)<br>21 (24.4)                                              | 0.615                   | 0.797                   | 0.170                          |
| <b>Histology</b>            | ADK<br>SCC<br>Large cell carcinoma<br>Adenosquamous carcinoma                                              | 53 (61.6)<br>29 (33.7)<br>3 (3.5)<br>1 (1.2)                                                | 0.287                   | 0.370                   | 0.065                          |
| <b>Type of surgery</b>      | Lobectomy/bilobectomy<br>Pneumonectomy<br>Atypical resection<br>Anatomical resection                       | 68 (79)<br>2 (2.4)<br>8 (8.3)<br>8 (9.3)                                                    | 0.816                   | 0.844                   | 0.440                          |
| <b>Smoking history</b>      | Current smoker<br>Former smoker<br>Never smoker                                                            | 25 (29.1)<br>48 (55.8)<br>13 (15.1)                                                         | 0.308                   | 0.312                   | 0.118                          |
| <b>Relapse</b>              | No<br>Yes                                                                                                  | 63 (73.3)<br>23 (26.7)                                                                      | -                       | -                       | 0.745                          |
| <b>Emphysema</b>            | Yes<br>No<br>Unknown                                                                                       | 38 (53.5)<br>33 (46.5)<br>15 (17.4)                                                         | 0.086                   | 0.211                   | 0.124                          |
| <b>COPD<sup>c</sup></b>     | Yes<br>No<br>Unknown                                                                                       | 51 (59.3)<br>24 (27.9)<br>11 (12.8)                                                         | 0.838                   | 0.765                   | 0.098                          |
| <b>DLCO<sup>d</sup> (%)</b> | Mean (Range)<br>≥60%<br><60%                                                                               | 73.4 (35-101)<br>50/60 (83.3)<br>10/60 (11.6)                                               | 0.270                   | 0.216                   | 0.077                          |
| <b>Molecular Features</b>   | TP53 mutation<br>TP53 WT<br>KRAS mutation<br>KRAS WT<br>EGFR mutation <sup>b</sup><br>EGFR WT <sup>b</sup> | 17/64 (26.6)<br>47/64 (73.4)<br>10/66 (15.2)<br>56/66 (84.8)<br>8/30 (26.7)<br>22/30 (73.3) | 0.358<br>0.955<br>0.302 | 0.875<br>0.879<br>0.217 | <b>0.026</b><br>0.461<br>0.208 |

<sup>a</sup> Eastern Cooperative Oncology Group performance status

<sup>b</sup> EGFR mutational status was assessed only in adenocarcinoma patients.

<sup>c</sup> COPD Chronic Obstructive Pulmonary Disease.

<sup>d</sup> DLCO Carbon monoxide diffusing capacity.

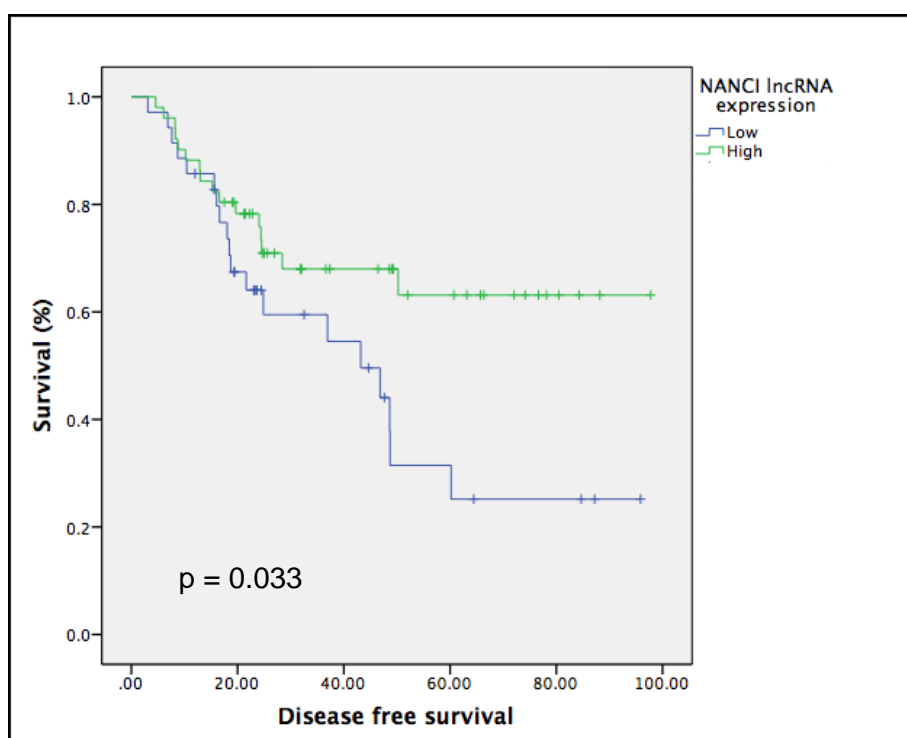

**Supplementary Figure 2.** Kaplan Meier analysis of disease-free survival DFS according to NANCI expression levels 8<sup>th</sup> TNM edition.

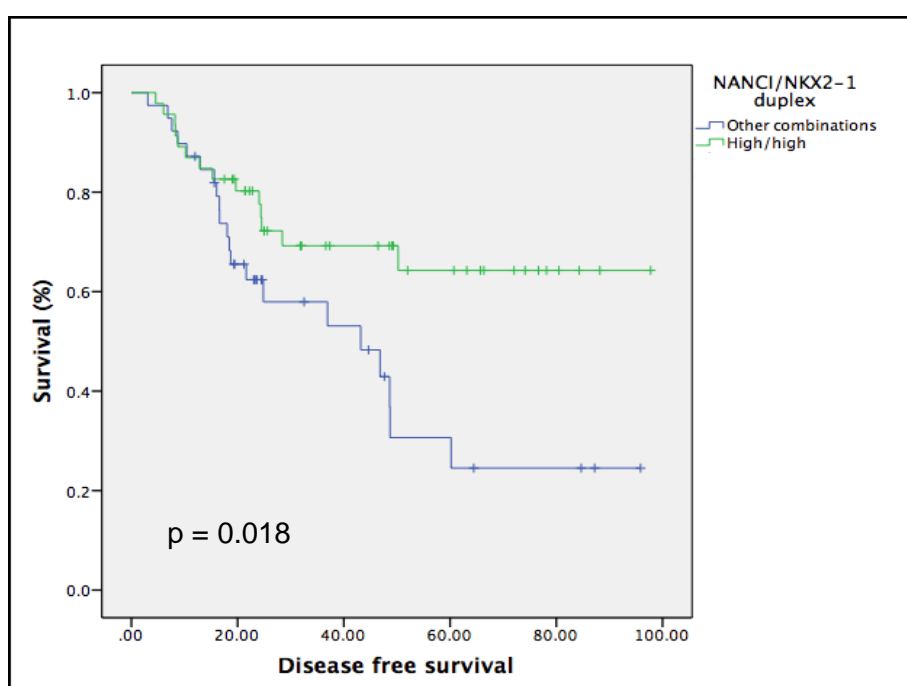

**Supplementary Figure 3.** Kaplan Meier analysis of disease-free survival DFS according to high/high NANCI/NKX2-1 duplex expression 8<sup>th</sup> TNM edition.

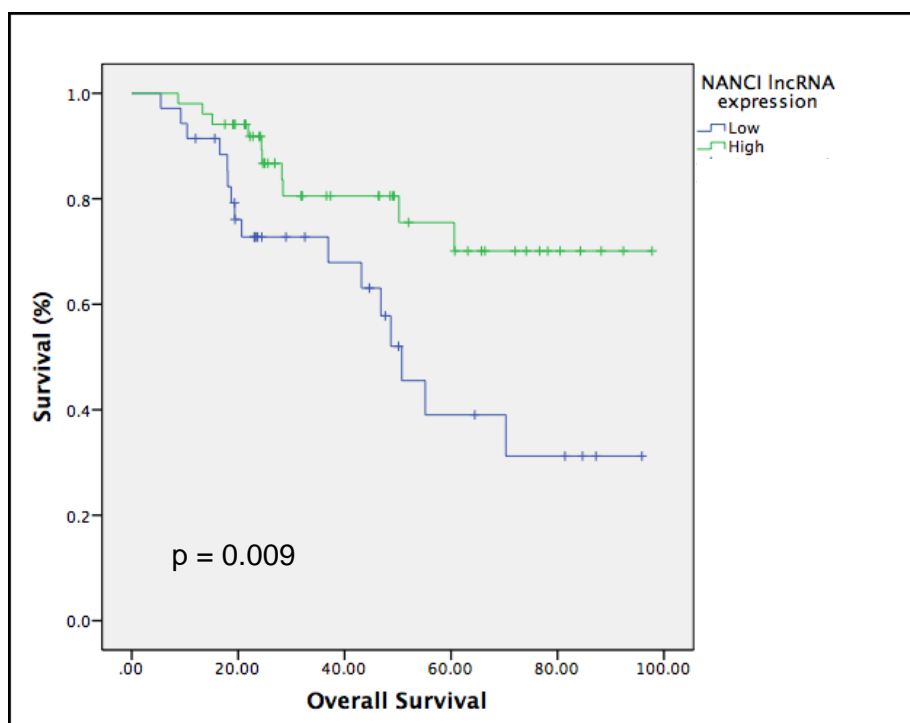

**Supplementary figure 4.** Kaplan Meier analysis of overall survival (OS)

according to NANCI expression 8<sup>th</sup> TNM edition.

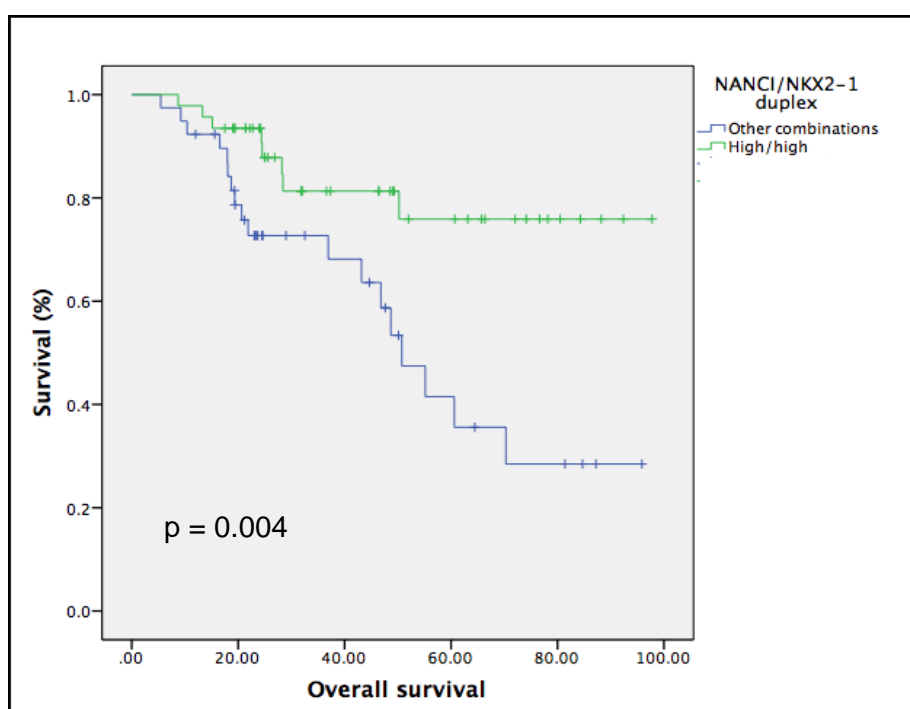

**Supplementary figure 5.** Kaplan Meier analysis of overall survival (OS)

according to high NANCI/high NKX2-1 duplex expression 8<sup>th</sup> TNM edition.

**Supplementary Table 2. Multivariate analysis for DFS and OS according 8<sup>th</sup> TNM edition.**

| <i><b>Disease free Survival</b></i> | <i><b>Hazard Ratio (95%CI)</b></i> | <i><b>p-value</b></i> |
|-------------------------------------|------------------------------------|-----------------------|
| Male sex                            | 3.063 (0.876-10.714)               | 0.080                 |
| Emphysema                           | 1.810 (0.850-3.854)                | 0.124                 |
| High NNCI/High NKX2-1               | 0.488 (0.223-1.067)                | 0.072                 |
| <i><b>Overall Survival</b></i>      | <i><b>Hazard Ratio (95%CI)</b></i> | <i><b>p-value</b></i> |
| Male sex                            | 5.088(0.639-40.499)                | 0.124                 |
| Former/Current smoker               | 4.208 (0.339-52.158)               | 0.263                 |
| Emphysema                           | 2.143 (0.846-5.425)                | 0.108                 |
| <b>High NNCI/High NKX2-1</b>        | <b>0.291 (0.112-0.759)</b>         | <b>0.012</b>          |
